# Supplementary material for: Predicting the Kinetic Properties Associated with Redox Imbalance after Oxidative Crisis in G6PD-Deficient Erythrocytes: A Simulation Study
Source: Hindawi journal article supplement (doi:10.1155/2011/398945), 2011-01-01

Initial GSH/GSSG

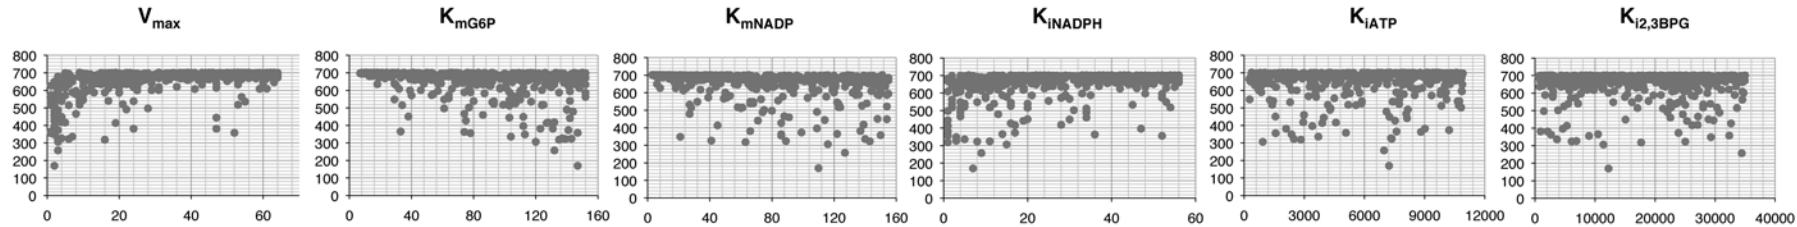

Recovery Time

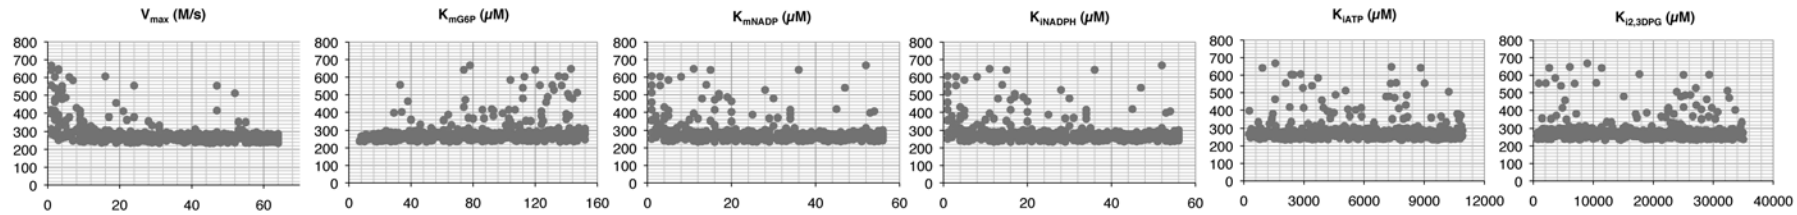

Amount of change

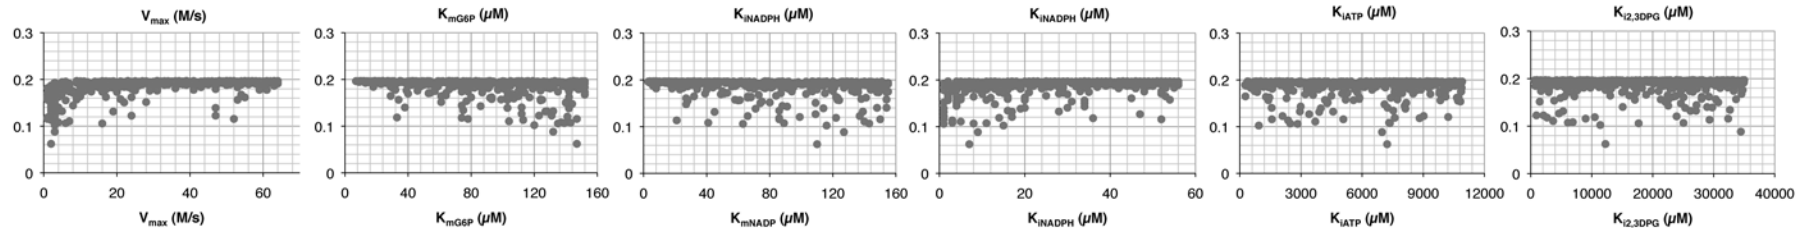

Supplement: f4 [file 398945.f4.pdf]
